# Supplementary material for: Filter paper collection of Plasmodium falciparum mRNA for detecting low-density gametocytes
Source: Malar J. 2012 Aug 8;11:266. doi: 10.1186/1475-2875-11-266 (PMC3441243; doi:10.1186/1475-2875-11-266)
Supplement: Additional file 1 — Table S1. Primer sequences for quantitative nucleic acid sequence based amplification (QT-NASBA) and reverse transcription polymerase chain reaction (RT-PCR). [file 1475-2875-11-266-S1.xlsx]

## Sheet: S1
Technique	Primer	Sequence
QT-NASBA	Pfs25forward	AATTCTAATACGACTCACTATAGGGAGAAGGCATTTACCGTTACCACAAGTTA
	Pfs25Reverse	GACTGTAAATAAACCATGTGGAGA
	Pfs25Beacon	Texas_Red-cgatcg-cccgtttcatacgcttgtaa-cgatcg-DABCYL
RT-PCR	Pfs25 2forward	TAATGCGAAAGTTACCGTGG
	Pfs25 1reverse	TCCATCAACAGCTTTACAGG
	Nested 6 forward	AACCATGTGGAGATTTTTCC
	Nested 7 reverse	ACATTCTTACATTCATTTGG
