# Supplementary material for: Filter paper collection of Plasmodium falciparum mRNA for detecting low-density gametocytes
Source: Malar J. 2012 Aug 8;11:266. doi: 10.1186/1475-2875-11-266 (PMC3441243; doi:10.1186/1475-2875-11-266)
Supplement: Additional file 3 — Table S3. Detection by QT-NASBA of low-density gametocytes stored on filter papers under a range of incubation conditions. Description of data: Data is represented as percent detection, and number of successes/number of tests, for gametocytes stored on Whatman 903 Protein Saver, the Whatman FTA Classic Card and the Whatman 3MM filter paper for five weeks (top value) and 13 weeks (bottom value). All negative controls were negative (data not shown), NT represents a condition that was not tested [file 1475-2875-11-266-S3.xlsx]

## Sheet: S3
				Whatman 903 Protein Saver			Whatman FTA classic Card			Whatman 3MM
				gametocyte density/µl			gametocyte density/µl			gametocyte density/µl
condition category	Drying conditions	week 1	subsequent weeks	10	1	0.1	10	1	0.1	10	1	0.1
unchanging temperature	dry	-80 °C	-80 °C	100 (3/3)	100 (3/3)	100 (3/3)	100 (3/3)	100 (3/3)	100 (3/3)	NT	NT	NT
	dry	-20 °C	-20 °C	100 (3/3)	40 (2/5)	100 (3/3)	100 (3/3)	40 (2/5)	20 (1/5)	100 (3/3)	100 (3/3)	80 (4/5)
				100 (2/2)	66.7 (2/3)	66.7 (2/3)	100 (2/2)	100 (2/2)	100 (2/2)	100 (3/3)	80 (4/5)	60 (3/5)
	dry	22°C	22°C	100 (3/3)	100 (3/3)	100 (3/3)	60 (3/5)	80 (4/5)	20 (1/5)	100 (3/3)	100 (3/3)	66.7 (2/3)
				100 (3/3)	80 (4/5)	100 (3/3)	60 (3/5)	60 (3/5)	40 (2/5)	100 (3/3)	100 (3/3)	100 (3/3)
	dry	35 °C	35 °C	100 (3/3)	100 (3/3)	100 (3/3)	100 (3/3)	0 (0/3)	NT	NT	NT	NT
				100 (3/3)	100 (3/3)	100 (3/3)	60 (3/5)	0 (0/3)	0 (0/5)	NT	NT	NT
changing temperatures	dry	4 °C	-20 °C	60 (3/5)	100 (3/3)	0 (0/3)	100 (3/3)	100 (3/3)	0 (0/3)	NT	NT	NT
				100 (3/3)	100 (3/3)	20 (1/5)	100 (3/3)	80 (4/5)	0 (0/3)	NT	NT	NT
	dry	22°C	-20 °C	100 (3/3)	100 (3/3)	40 (2/5)	100 (3/3)	60 (3/5)	20 (1/5)	NT	NT	NT
				100 (3/3)	100 (3/3)	40 (2/5)	100 (3/3)	80 (4/5)	0 (0/3)	NT	NT	NT
	dry	35 °C	-20 °C	100 (3/3)	100 (3/3)	80 (4/5)	100 (3/3)	40 (2/5)	0 (0/3)	100 (3/3)	100 (3/3)	20 (1/5)
				100 (3/3)	40 (2/5)	60 (3/5)	100 (3/3)	60 (3/5)	0 (0/3)	100 (3/3)	100 (3/3)	80 (4/5)
humid conditions	wet	22°C	-20 °C	100 (3/3)	100 (3/3)	60 (3/5)	40 (2/5)	20 (1/5)	0 (0/5)	NT	NT	NT
				100 (3/3)	100 (3/3)	0 (0/3)	100 (3/3)	0 (0/3)	NT	NT	NT	NT
	wet	35 °C	35 °C	100 (3/3)	100 (3/3)	33.3 (1/3)	0 (0/3)	NT	NT	NT	NT	NT
				60 (3/5)	60 (3/5)	0 (0/5)	0 (0/3)	NT	NT	NT	NT	NT
